# Supplementary material for: Effects of ertugliflozin on kidney composite outcomes, renal function and albuminuria in patients with type 2 diabetes mellitus: an analysis from the randomised VERTIS CV trial
Source: PubMed Central journal article supplement (PMC8099851; doi:10.1007/s00125-021-05407-5), 2021-03-04
Supplement: 125_2021_5407_MOESM2_ESM.pdf [file 125_2021_5407_MOESM2_ESM.pdf]

## Electronic Supplementary Materials

Supplement to: **Effects of ertugliflozin on kidney composite outcomes, renal function and albuminuria in patients with type 2 diabetes mellitus: an analysis from the randomised VERTIS CV trial**

David Z. I. Cherney<sup>1</sup>· Bernard Charbonnel<sup>2</sup>· Francesco Cosentino<sup>3</sup>· Samuel Dagogo-Jack<sup>4</sup>· Darren K. McGuire<sup>5, 6</sup>· Richard Pratley<sup>7</sup>· Weichung J. Shih<sup>8, 9</sup>· Robert Frederich<sup>10</sup>· Mario Maldonado<sup>11</sup>· Annpey Pong<sup>12</sup>· Christopher P. Cannon<sup>13</sup>, on behalf of the VERTIS CV Investigators

<sup>1</sup> University of Toronto, Toronto, ON, Canada

<sup>2</sup> University of Nantes, Nantes, France

<sup>3</sup> Unit of Cardiology, Karolinska Institute & Karolinska University Hospital, Stockholm, Sweden

<sup>4</sup> University of Tennessee Health Science Center, Memphis, TN, USA

<sup>5</sup> University of Texas Southwestern Medical Center, Dallas, TX, USA

<sup>6</sup> Parkland Health and Hospital System, Dallas, TX, USA

<sup>7</sup> AdventHealth Translational Research Institute, Orlando, FL, USA

<sup>8</sup> Rutgers School of Public Health, New Brunswick, NJ, USA

<sup>9</sup> Rutgers Cancer Institute of New Jersey, New Brunswick, NJ, USA

<sup>10</sup> Pfizer Inc., Collegeville, PA, USA

<sup>11</sup> MSD Limited, London, UK

<sup>12</sup> Merck & Co., Inc., Kenilworth, NJ, USA

<sup>13</sup> Cardiovascular Division, Brigham and Women's Hospital, Harvard Medical School,  
Boston, MA, USA

## **Electronic supplementary material**

**Table 1** Baseline demographic and disease characteristics

**Table 2** Baseline demographic and disease characteristics by baseline eGFR category

**Table 3** Baseline demographic and disease characteristics by baseline UACR category

**Table 4** Baseline demographic and disease characteristics by baseline KDIGO CKD risk category

**Table 5** Composite of doubling of serum creatinine, kidney dialysis/transplant, or renal death by baseline kidney function categories

**Table 6** Composite of sustained doubling of serum creatinine, chronic kidney dialysis/transplant, or renal death by baseline kidney function categories

**Table 7** Composite of sustained 40% reduction from baseline in eGFR, chronic kidney dialysis/transplant, or by baseline kidney function categories

**Table 8** Hazard models for time to first progression and regression of albuminuria status by baseline UACR and KDIGO CKD risk categories (ITT population)

**Fig. 1** Prognosis of CKD by GFR and albuminuria category

**Fig. 2** Kaplan–Meier plot for the time to first event in the sensitivity analysis (sustained doubling of serum creatinine, chronic kidney dialysis/transplant or renal death) (ITT)

**Fig. 3** Kaplan–Meier plot for the time to first event in the pre-specified exploratory kidney composite outcome (sustained 40% decrease from baseline in eGFR, chronic renal dialysis/transplant, or renal death) by ertugliflozin dose (ITT)

**Fig. 4** Per cent change from baseline in UACR by ertugliflozin dose (FAS population)

**Fig. 5** Per cent change from baseline in UACR in participants assigned to the KDIGO CKD low-risk category (**a**), moderate-risk category (**b**) and high-/very high-risk category (**c**) (all FAS)

**Fig. 6** Per cent change from baseline in UACR in participants with CKD stage 1 at baseline (**a**), CKD stage 2 at baseline (**b**) and CKD stage 3 at baseline (**c**) (all FAS)

**Fig. 7** Mean eGFR over time in the overall population using the MDRD equation (**a**), by ertugliflozin dose using the CKD-EPI equation (**b**) and by ertugliflozin dose using the MDRD equation (**c**) (all FAS)

**Fig. 8** Mean eGFR over time in participants assigned to the KDIGO CKD low-risk category (**a**), moderate-risk category (**b**) and high-/very high-risk category (**c**) (all FAS)

**Fig. 9** Mean eGFR over time in participants with CKD stage 1 at baseline (**a**), CKD stage 2 at baseline (**b**) and CKD stage 3 at baseline (**c**) (all FAS)

**Table 1** Baseline demographic and disease characteristics of the overall population

| Characteristic                                                                    | Placebo<br>(n=2747) | Ertugliflozin 5<br>mg<br>(n=2752) | Ertugliflozin 15<br>mg<br>(n=2747) | Ertugliflozin<br>(pooled)<br>(n=5499) |
|-----------------------------------------------------------------------------------|---------------------|-----------------------------------|------------------------------------|---------------------------------------|
| Female sex, <i>n</i> (%)                                                          | 844 (30.7)          | 801 (29.1)                        | 832 (30.3)                         | 1633 (29.7)                           |
| Age, years                                                                        | 64.4 (8.0)          | 64.3 (8.2)                        | 64.4 (8.0)                         | 64.4 (8.1)                            |
| Age, <i>n</i> (%)                                                                 |                     |                                   |                                    |                                       |
| <60 years old (%)                                                                 | 721 (26.2)          | 753 (27.4)                        | 733 (26.7)                         | 1486 (27.0)                           |
| ≥60 years old (%)                                                                 | 2026 (73.8)         | 1999 (72.6)                       | 2014 (73.3)                        | 4013 (73.0)                           |
| Race, <i>n</i> (%)                                                                |                     |                                   |                                    |                                       |
| White                                                                             | 2414 (87.9)         | 2390 (86.8)                       | 2436 (88.7)                        | 4826 (87.8)                           |
| Black or African American                                                         | 69 (2.5)            | 91 (3.3)                          | 75 (2.7)                           | 166 (3.0)                             |
| Asian                                                                             | 162 (5.9)           | 187 (6.8)                         | 149 (5.4)                          | 336 (6.1)                             |
| Multiple                                                                          | 70 (2.5)            | 67 (2.4)                          | 69 (2.5)                           | 136 (2.5)                             |
| Other (American Indian, Alaska Native, Native Hawaiian or Other Pacific Islander) | 32 (1.2)            | 17 (0.6)                          | 18 (0.7)                           | 35 (0.6)                              |
| HbA1c, mmol/mol                                                                   | 66.3 (10.3)         | 66.8 (10.6)                       | 66.5 (10.4)                        | 66.6 (10.5)                           |
| HbA1c, %                                                                          | 8.2 (0.9)           | 8.3 (1.0)                         | 8.2 (1.0)                          | 8.2 (1.0)                             |
| Duration of T2DM, years                                                           | 13.1 (8.4)          | 13.1 (8.4)                        | 12.7 (8.2)                         | 12.9 (8.3)                            |
| Haemoglobin, g/L                                                                  | 139.5 (13.7)        | 140.3 (13.8)                      | 139.7 (13.3)                       | 140.0 (13.5)                          |
| Body weight, kg                                                                   | 91.9 (18.3)         | 91.9 (18.4)                       | 91.6 (18.6)                        | 91.7 (18.5)                           |
| BMI, kg/m <sup>2</sup>                                                            | 32.0 (5.5)          | 31.8 (5.3)                        | 32.0 (5.4)                         | 31.9 (5.4)                            |
| BMI, <i>n</i> (%)                                                                 |                     |                                   |                                    |                                       |
| <30 kg/m <sup>2</sup>                                                             | 1046 (38.1)         | 1066 (38.7)                       | 1066 (38.8)                        | 2132 (38.8)                           |
| 30 to <35 kg/m <sup>2</sup>                                                       | 1009 (36.7)         | 1016 (36.9)                       | 979 (35.6)                         | 1995 (36.3)                           |
| ≥35 kg/m <sup>2</sup>                                                             | 692 (25.2)          | 668 (24.3)                        | 701 (25.5)                         | 1369 (24.9)                           |
| eGFR, ml min <sup>-1</sup> [1.73 m] <sup>-2</sup> (MDRD)                          | 75.7 (20.8)         | 76.0 (20.8)                       | 76.2 (20.9)                        | 76.1 (20.9)                           |

|                                                    |                 |                 |                 |                 |
|----------------------------------------------------|-----------------|-----------------|-----------------|-----------------|
| UACR, mg/mmol (median [IQR])                       | 2.1 (0.7–7.5)   | 2.0 (0.7–7.7)   | 2.1 (0.7–7.8)   | 2.0 (0.7–7.8)   |
| UACR, mg/g (median [IQR])                          | 19.0 (6.0–66.5) | 18.0 (6.0–68.0) | 19.0 (6.0–69.0) | 18.0 (6.0–69.0) |
| SBP, mmHg                                          | 133.1 (13.9)    | 133.7 (13.7)    | 133.2 (13.8)    | 133.5 (13.7)    |
| DBP, mmHg                                          | 76.4 (8.7)      | 76.8 (8.5)      | 76.7 (8.2)      | 76.8 (8.3)      |
| LDL cholesterol, mmol/L                            | 2.3 (1.0)       | 2.3 (1.0)       | 2.3 (1.0)       | 2.3 (1.0)       |
| Glucose-lowering agents, <i>n</i> (%)              |                 |                 |                 |                 |
| Insulin                                            | 1344 (48.9)     | 1308 (47.5)     | 1248 (45.4)     | 2556 (46.5)     |
| Biguanides                                         | 2124 (77.3)     | 2071 (75.3)     | 2097 (76.3)     | 4168 (75.8)     |
| Sulphonylureas                                     | 1122 (40.8)     | 1121 (40.7)     | 1147 (41.8)     | 2268 (41.2)     |
| DPP4 inhibitors                                    | 292 (10.6)      | 301 (10.9)      | 318 (11.6)      | 619 (11.3)      |
| GLP-1 RA                                           | 86 (3.1)        | 109 (4.0)       | 83 (3.0)        | 192 (3.5)       |
| Other                                              | 122 (4.4)       | 108 (3.9)       | 99 (3.6)        | 207 (3.8)       |
| Antihypertensive agents, <i>n</i> (%)              |                 |                 |                 |                 |
| Antihypertensives (any)                            | 2632 (95.8)     | 2608 (94.8)     | 2613 (95.1)     | 5221 (94.9)     |
| RAAS inhibitors                                    | 2239 (81.5)     | 2228 (81.0)     | 2219 (80.8)     | 4447 (80.9)     |
| Calcium channel blockers                           | 950 (34.6)      | 935 (34.0)      | 912 (33.2)      | 1847 (33.6)     |
| β-blockers                                         | 1903 (69.3)     | 1884 (68.5)     | 1905 (69.3)     | 3789 (68.9)     |
| Diuretics                                          | 1196 (43.5)     | 1167 (42.4)     | 1179 (42.9)     | 2346 (42.7)     |
| Antiplatelet or antithrombotic drugs, <i>n</i> (%) | 2446 (89.0)     | 2439 (88.6)     | 2441 (88.9)     | 4880 (88.7)     |
| Lipid-lowering agents, <i>n</i> (%)                |                 |                 |                 |                 |
| Statin                                             | 2242 (81.6)     | 2259 (82.1)     | 2246 (81.8)     | 4505 (81.9)     |
| Ezetimibe                                          | 115 (4.2)       | 86 (3.1)        | 92 (3.3)        | 178 (3.2)       |
| Fibrates                                           | 243 (8.8)       | 226 (8.2)       | 198 (7.2)       | 424 (7.7)       |

Values are mean (standard deviation) unless otherwise stated. BMI, body mass index; DBP, diastolic blood pressure; DPP4, dipeptidyl peptidase 4; GLP-1 RA, glucagon-like peptide 1 receptor agonist; IQR, interquartile range; MDRD, Modification of Diet in Renal Disease; RAAS, renin–angiotensin–aldosterone system; SBP, systolic blood pressure; T2DM, type 2 diabetes mellitus; UACR, urinary albumin-to-creatinine ratio.

**Table 2** Baseline demographic and disease characteristics by baseline eGFR

category

| Variable                                                    | CKD stage 1<br>N=2048 |                                     | CKD stage 2<br>N=4390 |                                     | CKD stage 3<br>N=1807 |                                     |
|-------------------------------------------------------------|-----------------------|-------------------------------------|-----------------------|-------------------------------------|-----------------------|-------------------------------------|
|                                                             | Placebo<br>n=678      | Ertugliflozin<br>(pooled)<br>n=1370 | Placebo<br>n=1461     | Ertugliflozin<br>(pooled)<br>n=2929 | Placebo<br>n=608      | Ertugliflozin<br>(pooled)<br>n=1199 |
| Age, years                                                  | 60.5 (7.4)            | 60.2 (7.9)                          | 64.7 (7.7)            | 64.7 (7.5)                          | 68.0 (7.5)            | 68.3 (7.6)                          |
| Female sex, n (%)                                           | 175 (25.8)            | 324 (23.6)                          | 458 (31.3)            | 868 (29.6)                          | 211 (34.7)            | 440 (36.7)                          |
| Duration of T2DM,<br>years                                  | 10.9 (6.7)            | 10.4 (7.0)                          | 12.7 (8.3)            | 13.1 (8.3)                          | 16.4 (9.3)            | 15.4 (8.8)                          |
| HbA1c, mmol/mol                                             | 67.7(10.9)            | 67.1 (10.8)                         | 65.5 (10.2)           | 66.5 (10.5)                         | 66.5 (9.7)            | 66.4 (10.1)                         |
| HbA1c, %                                                    | 8.3 (1.0)             | 8.3 (1.0)                           | 8.1 (0.9)             | 8.2 (1.0)                           | 8.2 (0.9)             | 8.2 (0.9)                           |
| BMI, kg/m <sup>2</sup>                                      | 31.5 (5.3)            | 31.7 (5.4)                          | 31.9 (5.4)            | 31.8 (5.3)                          | 32.7 (5.7)            | 32.3 (5.5)                          |
| eGFR, ml min <sup>-1</sup> [1.73<br>m] <sup>-2</sup> (MDRD) | 103.0<br>(12.3)       | 103.3<br>(12.7)                     | 74.3 (8.2)            | 74.5 (8.4)                          | 48.6 (8.0)            | 49.1 (8.0)                          |
| UACR, mg/mmol<br>(median [IQR])                             | 1.9 (0.8–<br>6.4)     | 2.0 (0.8–<br>6.6)                   | 1.9 (0.7–<br>6.2)     | 1.7 (0.7–<br>6.4)                   | 3.5 (0.9–<br>13.2)    | 3.4 (0.9–<br>15.4)                  |
| UACR, mg/g (median<br>[IQR])                                | 17.0 (7.0–<br>57.0)   | 18.0 (7.0–<br>58.0)                 | 17.0 (6.0–<br>55.0)   | 15.0 (6.0–<br>57.0)                 | 31.0 (8.0–<br>117.0)  | 30.0 (8.0–<br>136.0)                |
| SBP, mmHg                                                   | 132.5<br>(13.6)       | 133.3<br>(12.9)                     | 133.6<br>(13.5)       | 133.3<br>(13.7)                     | 132.6<br>(15.2)       | 134.1 (14.8)                        |
| Haemoglobin, g/L                                            | 142.9<br>(12.5)       | 142.6<br>(12.4)                     | 140.1<br>(13.3)       | 140.7<br>(13.3)                     | 134.6<br>(14.3)       | 135.4 (14.2)                        |
| Background treatment, n (%)                                 |                       |                                     |                       |                                     |                       |                                     |
| Insulin                                                     | 286 (42.2)            | 529 (38.6)                          | 691 (47.3)            | 1335 (45.6)                         | 367 (60.4)            | 692 (57.7)                          |
| Biguanides                                                  | 567 (83.6)            | 1137 (83.0)                         | 1169 (80.0)           | 2291 (78.2)                         | 388 (63.8)            | 739 (61.6)                          |
| Antihypertensives<br>, n (%)                                |                       |                                     |                       |                                     |                       |                                     |
| Antihypertensives<br>(any)                                  | 631 (93.1)            | 1251 (91.3)                         | 1404 (96.1)           | 2798 (95.5)                         | 597 (98.2)            | 1171 (97.7)                         |
| RAAS inhibitors                                             | 541 (79.8)            | 1056 (77.1)                         | 1195 (81.8)           | 2390 (81.6)                         | 503 (82.7)            | 1000 (83.4)                         |
| Diuretic                                                    | 216 (31.9)            | 430 (31.4)                          | 624 (42.7)            | 1252 (42.7)                         | 356 (58.6)            | 664 (55.4)                          |

|                                                    |            |             |             |             |            |             |
|----------------------------------------------------|------------|-------------|-------------|-------------|------------|-------------|
| Loop diuretic                                      | 49 (7.2)   | 118 (8.6)   | 193 (13.2)  | 405 (13.8)  | 184 (30.3) | 303 (25.3)  |
| Mineralocorticoid receptor antagonists             | 28 (4.1)   | 78 (5.7)    | 111 (7.6)   | 229 (7.8)   | 85 (14.0)  | 143 (11.9)  |
| Antiplatelet or antithrombotic drugs, <i>n</i> (%) | 601 (88.6) | 1201 (87.7) | 1295 (88.6) | 2615 (89.3) | 550 (90.5) | 1064 (88.7) |
| Lipid-lowering agents, <i>n</i> (%)                | 561 (82.7) | 1130 (82.5) | 1223 (83.7) | 2478 (84.6) | 529 (87.0) | 1046 (87.2) |

---

Values are mean (SD) unless otherwise stated. CKD, chronic kidney disease; IQR, interquartile range; MDRD,

Modification of Diet in Renal Disease; RAAS, renin–angiotensin–aldosterone system; SBP, systolic blood pressure; T2DM, type 2 diabetes mellitus; UACR, urinary albumin-to-creatinine ratio.



**Table 3** Baseline demographic and disease characteristics by baseline UACR category

| Variable                                                 | Normoalbuminuria<br>N=4783 |                                     | Microalbuminuria<br>N=2492 |                                     | Macroalbuminuria<br>N=755 |                                    |
|----------------------------------------------------------|----------------------------|-------------------------------------|----------------------------|-------------------------------------|---------------------------|------------------------------------|
|                                                          | Placebo<br>n=1597          | Ertugliflozin<br>(pooled)<br>n=3186 | Placebo<br>n=845           | Ertugliflozin<br>(pooled)<br>n=1647 | Placebo<br>n=242          | Ertugliflozin<br>(pooled)<br>n=513 |
| Age, years                                               | 64.2 (8.0)                 | 64.4 (8.1)                          | 64.9 (8.0)                 | 64.4 (8.0)                          | 63.2 (7.8)                | 64.1 (7.8)                         |
| Female sex, n (%)                                        | 549 (34.4)                 | 1025 (32.2)                         | 210 (24.9)                 | 446 (27.1)                          | 65 (26.9)                 | 108 (21.1)                         |
| Duration of T2DM, years                                  | 12.4 (8.2)                 | 12.4 (8.2)                          | 13.8 (8.2)                 | 13.3 (8.3)                          | 15.5 (9.6)                | 14.8 (8.0)                         |
| HbA1c, mmol/mol                                          | 65.2 (10.0)                | 65.5 (10.3)                         | 67.7 (10.7)                | 68.0 (10.5)                         | 68.5 (10.6)               | 69.3 (10.9)                        |
| HbA1c, %                                                 | 8.1 (0.9)                  | 8.1 (0.9)                           | 8.3 (1.0)                  | 8.4 (1.0)                           | 8.4 (1.0)                 | 8.5 (1.0)                          |
| BMI, kg/m <sup>2</sup>                                   | 31.7 (5.4)                 | 31.8 (5.3)                          | 32.0 (5.4)                 | 31.8 (5.2)                          | 33.0 (5.7)                | 32.5 (5.7)                         |
| eGFR, ml min <sup>-1</sup> [1.73 m] <sup>-2</sup> (MDRD) | 77.5 (20.2)                | 77.4 (19.9)                         | 74.4 (21.2)                | 75.7 (21.5)                         | 68.3 (22.2)               | 68.3 (22.3)                        |
| UACR, mg/mmol (median [IQR])                             | 0.9 (0.5–1.6)              | 0.9 (0.5–1.6)                       | 7.6 (4.9–13.0)             | 7.8 (4.9–13.8)                      | 84.5 (48.6–163.7)         | 78.6 (48.4–153.6)                  |
| UACR, mg/g (median [IQR])                                | 8.0 (4.0–14.0)             | 8.0 (4.0–14.0)                      | 67.0 (43.0–115.0)          | 69.0 (43.0–122.0)                   | 748.0 (430.0–1359.0)      | 696.0 (428.0–1359.0)               |
| SBP, mmHg                                                | 131.3 (13.5)               | 131.4 (13.3)                        | 134.9 (14.0)               | 135.6 (13.4)                        | 139.1 (13.6)              | 140.3 (13.8)                       |
| Haemoglobin, g/L                                         | 139.5 (13.4)               | 140.1 (12.9)                        | 139.8 (13.7)               | 140.5 (14.1)                        | 138.8 (15.2)              | 138.5 (15.4)                       |
| Background treatment, n (%)                              |                            |                                     |                            |                                     |                           |                                    |
| Insulin                                                  | 725 (45.4)                 | 1353 (42.5)                         | 438 (51.8)                 | 828 (50.3)                          | 152 (62.8)                | 297 (57.9)                         |
| Biguanides                                               | 1253 (78.5)                | 2455 (77.1)                         | 654 (77.4)                 | 1247 (75.7)                         | 169 (69.8)                | 360 (70.2)                         |
| Antihypertensives, n (%)                                 |                            |                                     |                            |                                     |                           |                                    |
| Antihypertensives (any)                                  | 1535 (96.1)                | 3012 (94.5)                         | 804 (95.1)                 | 1580 (95.9)                         | 232 (95.9)                | 488 (95.1)                         |
| RAAS inhibitors                                          | 1306 (81.8)                | 2532 (79.5)                         | 681 (80.6)                 | 1373 (83.4)                         | 200 (82.6)                | 424 (82.7)                         |

|                                                    |             |             |            |             |            |            |
|----------------------------------------------------|-------------|-------------|------------|-------------|------------|------------|
| Diuretic                                           | 681 (42.6)  | 1325 (41.6) | 363 (43.0) | 717 (43.5)  | 125 (51.7) | 249 (48.5) |
| Loop diuretic                                      | 215 (13.5)  | 435 (13.7)  | 143 (16.9) | 262 (15.9)  | 62 (25.6)  | 108 (21.1) |
| Mineralocorticoid receptor antagonists             | 133 (8.3)   | 273 (8.6)   | 72 (8.5)   | 128 (7.8)   | 14 (5.8)   | 38 (7.4)   |
| Antiplatelet or antithrombotic drugs, <i>n</i> (%) | 1424 (89.2) | 2859 (89.7) | 752 (89.0) | 1434 (87.1) | 212 (87.6) | 451 (87.9) |
| Lipid-lowering agents, <i>n</i> (%)                | 1361 (85.2) | 2718 (85.3) | 696 (82.4) | 1377 (83.6) | 203 (83.9) | 431 (84.0) |

---

Values are mean (SD) unless otherwise stated. IQR, interquartile range; MDRD, Modification of Diet in Renal Disease; RAAS, renin–angiotensin–aldosterone system; SBP, systolic blood pressure; T2DM, type 2 diabetes mellitus; UACR, urinary albumin-to-creatinine ratio.

**Table 4** Baseline demographic and disease characteristics by baseline KDIGO CKD

risk category

| Variable                                                    | Baseline KDIGO CKD risk category |                                     |                                |                                     |                                      |                                     |
|-------------------------------------------------------------|----------------------------------|-------------------------------------|--------------------------------|-------------------------------------|--------------------------------------|-------------------------------------|
|                                                             | Low risk of CKD<br>N=3916        |                                     | Moderate risk of CKD<br>N=2568 |                                     | High/very high risk of CKD<br>N=1548 |                                     |
|                                                             | Placebo<br>n=1307                | Ertugliflozin<br>(pooled)<br>n=2609 | Placebo<br>n=859               | Ertugliflozin<br>(pooled)<br>n=1709 | Placebo<br>n=517                     | Ertugliflozin<br>(pooled)<br>n=1031 |
| Age, years                                                  | 63.2 (7.8)                       | 63.4 (7.9)                          | 65.0 (7.9)                     | 64.5 (7.9)                          | 66.3 (8.2)                           | 66.5 (8.1)                          |
| Female sex, n (%)                                           | 426 (32.6)                       | 785 (30.1)                          | 245 (28.5)                     | 499 (29.2)                          | 152 (29.4)                           | 297 (28.8)                          |
| Duration of T2DM,<br>years                                  | 11.5 (7.6)                       | 11.9 (7.9)                          | 13.8 (8.5)                     | 13.1 (8.4)                          | 16.1 (9.3)                           | 15.1 (8.5)                          |
| HbA1c, mmol/mol                                             | 65.1 (10.1)                      | 65.5 (10.4)                         | 67.3 (10.6)                    | 67.3 (10.5)                         | 67.4 (10.2)                          | 68.1 (10.6)                         |
| HbA1c, %                                                    | 8.1 (0.9)                        | 8.1 (0.9)                           | 8.3 (1.0)                      | 8.3 (1.0)                           | 8.3 (0.9)                            | 8.4 (1.0)                           |
| BMI, kg/m <sup>2</sup>                                      | 31.5 (5.3)                       | 31.6 (5.2)                          | 32.0 (5.2)                     | 32.1 (5.3)                          | 32.8 (6.0)                           | 32.2 (5.5)                          |
| eGFR, ml min <sup>-1</sup> [1.73<br>m] <sup>-2</sup> (MDRD) | 83.8 (16.4)                      | 83.5 (16.3)                         | 75.2 (19.6)                    | 75.9 (20.1)                         | 56.3 (19.9)                          | 57.1 (20.2)                         |
| UACR, mg/mmol<br>(median [IQR])                             | 0.9<br>(0.6–1.6)                 | 0.9<br>(0.5–1.6)                    | 5.4<br>(3.1–10.4)              | 5.4<br>(2.8–10.2)                   | 25.7<br>(5.7–78.9)                   | 34.0<br>(6.7–78.6)                  |
| UACR, mg/g (median<br>[IQR])                                | 8.0<br>(5.0–14.0)                | 8.0<br>(4.0–14.0)                   | 48.0<br>(27.0–92.0)            | 48.0<br>(25.0–90.0)                 | 227.0<br>(50.0–<br>698.5)            | 301.0<br>(59.0–<br>696.0)           |
| SBP, mmHg                                                   | 131.6<br>(13.4)                  | 131.6<br>(13.0)                     | 133.8<br>(13.6)                | 134.2<br>(13.7)                     | 135.8<br>(15.3)                      | 137.4 (14.4)                        |
| Haemoglobin, g/L                                            | 140.7<br>(13.0)                  | 141.0<br>(12.5)                     | 139.5<br>(13.7)                | 140.7<br>(13.8)                     | 136.6<br>(14.9)                      | 136.6 (15.0)                        |
| Background treatment,<br>n (%)                              |                                  |                                     |                                |                                     |                                      |                                     |
| Insulin                                                     | 557 (42.6)                       | 1046 (40.1)                         | 436 (50.8)                     | 821 (48.0)                          | 320 (61.9)                           | 614 (59.6)                          |
| Biguanides                                                  | 1067 (81.6)                      | 2081 (79.8)                         | 672 (78.2)                     | 1316 (77.0)                         | 338 (65.4)                           | 666 (64.6)                          |
| Antihypertensives, n (%)                                    |                                  |                                     |                                |                                     |                                      |                                     |
| Antihypertensives<br>(any)                                  | 1249 (95.6)                      | 2452 (94.0)                         | 820 (95.5)                     | 1635 (95.7)                         | 501 (96.9)                           | 996 (96.6)                          |
| RAAS inhibitors                                             | 1063 (81.3)                      | 2066 (79.2)                         | 699 (81.4)                     | 1401 (82.0)                         | 425 (82.2)                           | 866 (84.0)                          |

|                                                          |             |             |            |             |            |            |
|----------------------------------------------------------|-------------|-------------|------------|-------------|------------|------------|
| Diuretic                                                 | 511 (39.1)  | 1006 (38.6) | 363 (42.3) | 733 (42.9)  | 295 (57.1) | 554 (53.7) |
| Loop diuretic                                            | 141 (10.8)  | 290 (11.1)  | 120 (14.0) | 264 (15.4)  | 158 (30.6) | 252 (24.4) |
| Mineralocorticoid<br>receptor<br>antagonists             | 92 (7.0)    | 191 (7.3)   | 70 (8.1)   | 142 (8.3)   | 57 (11.0)  | 107 (10.4) |
| Antiplatelet or<br>antithrombotic<br>drugs, <i>n</i> (%) | 1166 (89.2) | 2345 (89.9) | 757 (88.1) | 1491 (87.2) | 464 (89.7) | 909 (88.2) |
| Lipid-lowering<br>agents, <i>n</i> (%)                   | 1112 (85.1) | 2211 (84.7) | 705 (82.1) | 1438 (84.1) | 442 (85.5) | 881 (85.5) |

---

Values are mean (SD) unless otherwise stated. CKD, chronic kidney disease; IQR, interquartile range; KDIGO

CKD, Kidney Disease Improving Global Outcomes chronic kidney disease; MDRD, Modification of Diet in Renal

Disease; RAAS, renin–angiotensin–aldosterone system; SBP, systolic blood pressure; T2DM, type 2 diabetes

mellitus; UACR, urinary albumin-to-creatinine ratio.

**Table 5** Composite of doubling of baseline serum creatinine, kidney dialysis/transplant, or renal death by baseline kidney function categories (ITT population)

| Baseline kidney function category | Subgroups                  | Placebo<br>N=2747 |                                               | Ertugliflozin<br>N=5499 |                                               | AERR | HR (95% CI) <sup>b</sup> | p value for interaction <sup>c</sup> |
|-----------------------------------|----------------------------|-------------------|-----------------------------------------------|-------------------------|-----------------------------------------------|------|--------------------------|--------------------------------------|
|                                   |                            | n (%)             | Event rate per 1000 person-years <sup>a</sup> | n (%)                   | Event rate per 1000 person-years <sup>a</sup> |      |                          |                                      |
| Baseline eGFR category            | CKD stage 1<br>N=2048      | 22 (3.2)          | 9.3                                           | 46 (3.4)                | 9.6                                           | 0.3  | 1.04 (0.63, 1.73)        | 0.30                                 |
|                                   | CKD stage 2<br>N=4390      | 53 (3.6)          | 10.5                                          | 71 (2.4)                | 7.0                                           | -3.5 | 0.66 (0.46, 0.94)        |                                      |
|                                   | CKD stage 3<br>N=1807      | 33 (5.4)          | 16.3                                          | 58 (4.8)                | 14.7                                          | -1.6 | 0.90 (0.59, 1.38)        |                                      |
| Baseline UACR category            | Normoalbuminuria<br>N=4783 | 35 (2.2)          | 6.3                                           | 64 (2.0)                | 5.8                                           | -0.5 | 0.92 (0.61, 1.39)        | 0.43                                 |

|                                        |                                      |              |      |          |      |       |                   |      |
|----------------------------------------|--------------------------------------|--------------|------|----------|------|-------|-------------------|------|
|                                        | Microalbuminuria<br>N=2492           | 36 (4.3)     | 12.6 | 57 (3.5) | 10.0 | -2.6  | 0.80 (0.53, 1.21) |      |
|                                        | Macroalbuminuria<br>N=755            | 37<br>(15.3) | 50.0 | 50 (9.7) | 31.7 | -18.3 | 0.62 (0.41, 0.95) |      |
|                                        | Low risk of CKD<br>N=3916            | 30 (2.3)     | 6.5  | 45 (1.7) | 4.9  | -1.6  | 0.75 (0.48, 1.20) |      |
| Baseline KDIGO<br>CKD risk<br>category | Moderate risk of CKD<br>N=2568       | 32 (3.7)     | 10.9 | 60 (3.5) | 10.1 | -0.8  | 0.93 (0.61, 1.43) | 0.69 |
|                                        | High/very high risk of CKD<br>N=1548 | 46 (8.9)     | 27.6 | 67 (6.5) | 20.3 | -7.3  | 0.73 (0.50, 1.06) |      |

<sup>a</sup>Person-years is calculated as the sum of the participants' time to first event or time to censoring (the earliest of a participants' end of study date, death date, or last contact date).

<sup>b</sup>Ertugliflozin versus placebo, based on the stratified Cox proportional hazards model that includes treatment, subgroup, and treatment-by-subgroup interaction as explanatory factors and cohort category as a stratification factor.

<sup>c</sup>The interaction *p* value is for the treatment-by-subgroup interaction.

AERR, absolute event rate reduction; CKD, chronic kidney disease; ITT, intention to treat; KDIGO CKD, Kidney Disease Improving Global Outcomes chronic kidney disease; UACR, urinary albumin-to-creatinine ratio.

**Table 6** Composite of sustained doubling of serum creatinine, chronic kidney dialysis/transplant, or renal death by baseline kidney function categories (ITT population)

| Baseline kidney function category | Subgroups                  | Placebo<br>N=2747 |                                               | Ertugliflozin<br>N=5499 |                                               | AERR | HR (95% CI) <sup>b</sup> | p value for interaction <sup>c</sup> |
|-----------------------------------|----------------------------|-------------------|-----------------------------------------------|-------------------------|-----------------------------------------------|------|--------------------------|--------------------------------------|
|                                   |                            | n (%)             | Event rate per 1000 person-years <sup>a</sup> | n (%)                   | Event rate per 1000 person-years <sup>a</sup> |      |                          |                                      |
| Baseline eGFR category            | CKD stage 1<br>N=2048      | 12 (1.8)          | 5.0                                           | 10 (0.7)                | 2.1                                           | -2.9 | 0.41 (0.18, 0.96)        | 0.45                                 |
|                                   | CKD stage 2<br>N=4390      | 11 (0.8)          | 2.2                                           | 18 (0.6)                | 1.8                                           | -0.4 | 0.81 (0.38, 1.71)        |                                      |
|                                   | CKD stage 3<br>N=1807      | 10 (1.6)          | 4.9                                           | 15 (1.3)                | 3.8                                           | -1.1 | 0.77 (0.34, 1.71)        |                                      |
| Baseline UACR category            | Normoalbuminuria<br>N=4783 | 9 (0.6)           | 1.6                                           | 7 (0.2)                 | 0.6                                           | -1.0 | 0.39 (0.15, 1.05)        | 0.32                                 |

|                                     |                                                 |          |      |          |      |      |                   |      |
|-------------------------------------|-------------------------------------------------|----------|------|----------|------|------|-------------------|------|
|                                     | Microalbuminuria<br>N=2492                      | 7 (0.8)  | 2.4  | 15 (0.9) | 2.6  | 0.2  | 1.07 (0.44, 2.62) |      |
|                                     | Macroalbuminuria<br>UACR >3.39 mg/mmol<br>N=755 | 17 (7.0) | 22.4 | 21 (4.1) | 13.0 | -9.4 | 0.58 (0.31, 1.11) |      |
|                                     | Low risk of CKD<br>N=3916                       | 9 (0.7)  | 1.9  | 6 (0.2)  | 0.7  | -1.2 | 0.34 (0.12, 0.95) |      |
| Baseline KDIGO<br>CKD risk category | Moderate risk of CKD<br>N=2568                  | 5 (0.6)  | 1.7  | 13 (0.8) | 2.2  | 0.5  | 1.26 (0.45, 3.53) | 0.21 |
|                                     | High/very high risk of CKD<br>N=1548            | 19 (3.7) | 11.2 | 24 (2.3) | 7.2  | -4.0 | 0.64 (0.35, 1.18) |      |

<sup>a</sup>Person-years is calculated as the sum of the participants' time to first event or time to censoring (the earliest of a participants' end of study date, death date, or last contact date).

<sup>b</sup>Ertugliflozin versus placebo, based on the stratified Cox proportional hazards model that includes treatment, subgroup, and treatment-by-subgroup interaction as explanatory factors and cohort category as a stratification factor.

<sup>c</sup>The interaction *p* value is for the treatment-by-subgroup interaction.

AERR, absolute event rate reduction; CKD, chronic kidney disease; ITT, intention to treat; KDIGO CKD, Kidney Disease Improving Global Outcomes chronic kidney disease; UACR, urinary albumin-to-creatinine ratio.



**Table 7** Composite of sustained 40% reduction from baseline in eGFR, chronic kidney dialysis/transplant, or renal death by baseline kidney function categories (ITT population)

| Baseline kidney function category | Subgroups                  | Placebo<br>N=2747 |                                               | Ertugliflozin<br>N=5499 |                                               | AERR | HR (95% CI) <sup>b</sup> | p value for interaction <sup>c</sup> |
|-----------------------------------|----------------------------|-------------------|-----------------------------------------------|-------------------------|-----------------------------------------------|------|--------------------------|--------------------------------------|
|                                   |                            | n (%)             | Event rate per 1000 person-years <sup>a</sup> | n (%)                   | Event rate per 1000 person-years <sup>a</sup> |      |                          |                                      |
| Baseline eGFR category            | CKD stage 1<br>N=2048      | 22 (3.2)          | 9.3                                           | 39 (2.9)                | 8.2                                           | -1.1 | 0.89 (0.53, 1.49)        | 0.10                                 |
|                                   | CKD stage 2<br>N=4390      | 44 (3.0)          | 8.8                                           | 42 (1.4)                | 4.1                                           | -4.7 | 0.47 (0.31, 0.72)        |                                      |
|                                   | CKD stage 3<br>N=1807      | 19 (3.1)          | 9.4                                           | 32 (2.7)                | 8.1                                           | -1.3 | 0.86 (0.49, 1.52)        |                                      |
| Baseline UACR category            | Normoalbuminuria<br>N=4783 | 34 (2.1)          | 6.1                                           | 32 (1.0)                | 2.9                                           | -3.2 | 0.47 (0.29, 0.77)        | 0.16                                 |

|                                     |                                      |              |      |          |      |       |                   |      |
|-------------------------------------|--------------------------------------|--------------|------|----------|------|-------|-------------------|------|
|                                     | Microalbuminuria<br>N=2492           | 21 (2.5)     | 7.3  | 39 (2.4) | 6.9  | -0.4  | 0.93 (0.55, 1.59) |      |
|                                     | Macroalbuminuria<br>N=755            | 30<br>(12.4) | 40.8 | 36 (7.0) | 22.7 | -18.1 | 0.56 (0.35, 0.91) |      |
|                                     | Low risk of CKD<br>N=3916            | 31 (2.4)     | 6.8  | 27 (1.0) | 3.0  | -3.8  | 0.44 (0.26, 0.74) |      |
| Baseline KDIGO<br>CKD risk category | Moderate risk of CKD<br>N=2568       | 20 (2.3)     | 6.8  | 37 (2.2) | 6.2  | -0.6  | 0.90 (0.52, 1.55) | 0.17 |
|                                     | High/very high risk of CKD<br>N=1548 | 34 (6.6)     | 20.3 | 43 (4.2) | 13.0 | -7.3  | 0.64 (0.41, 1.01) |      |

<sup>a</sup>Person-years is calculated as the sum of the participants' time to first event or time to censoring (the earliest of a participants' end of study date, death date, or last contact date).

<sup>b</sup>Ertugliflozin versus placebo, based on the stratified Cox proportional hazards model that includes treatment, subgroup, and treatment-by-subgroup interaction as explanatory factors and cohort category as a stratification factor.

<sup>c</sup>The interaction *p* value is for the treatment-by-subgroup interaction.

AERR, absolute event rate reduction; CKD, chronic kidney disease; ITT, intention to treat; KDIGO CKD, Kidney Disease Improving Global Outcomes chronic kidney disease; UACR, urinary albumin-to-creatinine ratio.

**Table 8** Hazard models for time to first progression and regression of albuminuria status by baseline UACR and KDIGO CKD risk categories (ITT population)

| Baseline kidney function category | Subgroups                      | Placebo<br>N=2747 |                                               | Ertugliflozin<br>N=5499 |                                               | AERR  | HR (95% CI) <sup>b</sup> | p value for interaction <sup>c</sup> |
|-----------------------------------|--------------------------------|-------------------|-----------------------------------------------|-------------------------|-----------------------------------------------|-------|--------------------------|--------------------------------------|
|                                   |                                | n (%)             | Event rate per 1000 person-years <sup>a</sup> | n (%)                   | Event rate per 1000 person-years <sup>a</sup> |       |                          |                                      |
| <b>Progression of UACR</b>        |                                |                   |                                               |                         |                                               |       |                          |                                      |
| Baseline UACR category            | Normoalbuminuria<br>N=4783     | 575<br>(36.0)     | 162.6                                         | 1051<br>(33.0)          | 137.4                                         | -25.2 | 0.85 (0.77, 0.94)        | 0.02                                 |
|                                   | Microalbuminuria<br>N=2492     | 192<br>(22.7)     | 95.1                                          | 259<br>(15.7)           | 58.8                                          | -36.3 | 0.62 (0.52, 0.75)        |                                      |
| Baseline KDIGO CKD risk category  | Low risk of CKD<br>N=3916      | 453<br>(34.7)     | 151.2                                         | 838<br>(32.1)           | 130.1                                         | -21.1 | 0.86 (0.77, 0.97)        | 0.05                                 |
|                                   | Moderate risk of CKD<br>N=2568 | 232<br>(27.0)     | 116.0                                         | 352<br>(20.6)           | 78.7                                          | -37.3 | 0.68 (0.58, 0.81)        |                                      |

|                                     |                                      |               |       |               |       |       |                   |      |
|-------------------------------------|--------------------------------------|---------------|-------|---------------|-------|-------|-------------------|------|
|                                     | High/very high risk of CKD<br>N=1548 | 82<br>(15.9)  | 69.9  | 120<br>(11.6) | 48.2  | -21.7 | 0.69 (0.52, 0.92) |      |
| <b>Regression of UACR</b>           |                                      |               |       |               |       |       |                   |      |
| Baseline UACR<br>category           | Microalbuminuria<br>N=2492           | 387<br>(45.8) | 253.2 | 871<br>(52.9) | 311.0 | 57.8  | 1.24 (1.10, 1.39) | 0.04 |
|                                     | Macroalbuminuria<br>N=755            | 100<br>(41.3) | 239.2 | 304<br>(59.3) | 439.7 | 200.5 | 1.71 (1.37, 2.15) |      |
| Baseline KDIGO<br>CKD risk category | Moderate risk of CKD<br>N=2568       | 293<br>(34.1) | 165.3 | 688<br>(40.3) | 202.3 | 37.0  | 1.24 (1.08, 1.42) | 0.61 |
|                                     | High/very high risk of CKD<br>N=1548 | 193<br>(37.3) | 204.4 | 484<br>(46.9) | 288.1 | 83.7  | 1.38 (1.17, 1.63) |      |

<sup>a</sup>Person-years is calculated as the sum of the participants' time to first event or time to censoring (the earliest of a participants' end of study date, death date, or last contact date).

<sup>b</sup>Ertugliflozin versus placebo, based on the stratified Cox proportional hazards model that includes treatment, subgroup, and treatment-by-subgroup interaction as explanatory factors and cohort category as a stratification factor.

<sup>c</sup>The interaction *p* value is for the treatment-by-subgroup interaction.

AERR, absolute event rate reduction; CKD, chronic kidney disease; ITT, intention to treat; KDIGO CKD, Kidney Disease Improving Global Outcomes chronic kidney disease; UACR, urinary albumin-to-creatinine ratio.

**Fig. 1** Prognosis of CKD by GFR and albuminuria category

| <b>Prognosis of CKD by GFR<br/>and albuminuria categories:<br/>KDIGO 2012</b>             |     |                                  |       | <b>Persistent albuminuria categories<br/>Description and range</b>                          |                             |                          |
|-------------------------------------------------------------------------------------------|-----|----------------------------------|-------|---------------------------------------------------------------------------------------------|-----------------------------|--------------------------|
|                                                                                           |     |                                  |       | A1                                                                                          | A2                          | A3                       |
|                                                                                           |     |                                  |       | Normal to mildly increased                                                                  | Moderately increased        | Severely increased       |
|                                                                                           |     |                                  |       | <30 mg/g<br><3 mg/mmol                                                                      | 30–300 mg/g<br>3–30 mg/mmol | >300 mg/g<br>>30 mg/mmol |
| <b>GFR categories (ml min<sup>-1</sup> 1.73 m<sup>-2</sup>)<br/>Description and range</b> | G1  | Normal or high                   | ≥90   | Low risk                                                                                    | Moderate risk               | High risk                |
|                                                                                           | G2  | Mildly decreased                 | 60–89 | Low risk                                                                                    | Moderate risk               | High risk                |
|                                                                                           | G3a | Mildly to moderately decreased   | 45–59 | Moderate risk                                                                               | High risk                   | Very high risk           |
|                                                                                           | G3b | Moderately to severely decreased | 30–44 | High risk                                                                                   | Very high risk              | Very high risk           |
|                                                                                           | G4  | Severely decreased               | 15–29 | Patients with eGFR <30 ml min <sup>-1</sup> 1.73 m <sup>-2</sup><br>excluded from VERTIS CV |                             |                          |
|                                                                                           | G5  | Kidney failure                   | <15   |                                                                                             |                             |                          |

Participants assigned to the high- and very high-risk categories were pooled for the analyses. Green, low risk (if no other markers of kidney disease, no CKD); Yellow, moderately increased risk; Orange, high risk; Red, very high risk. CKD, chronic kidney disease; KDIGO, Kidney Disease: Improving Global Outcomes Prognosis of CKD by GFR and albuminuria category. Reprinted from Kidney international supplements, 3(1), Chapter 1: Definition and classification of CKD, 19–62, Copyright (2013), with permission from Elsevier.

**Fig. 2** Kaplan–Meier plot for the time to first event in the sensitivity analysis (sustained doubling of serum creatinine, chronic kidney dialysis/transplant or renal death) (ITT)

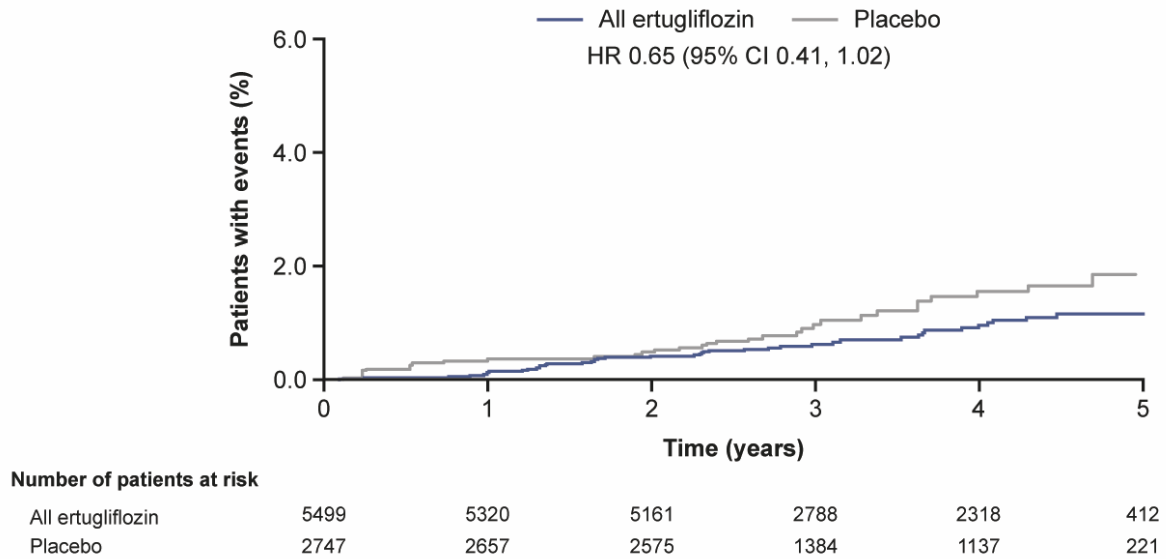

ITT, intention to treat.

**Fig. 3** Kaplan–Meier plot for the time to first event in the pre-specified exploratory kidney composite outcome (sustained 40% decrease from baseline in eGFR, chronic renal dialysis/transplant, or renal death) by ertugliflozin dose (ITT)

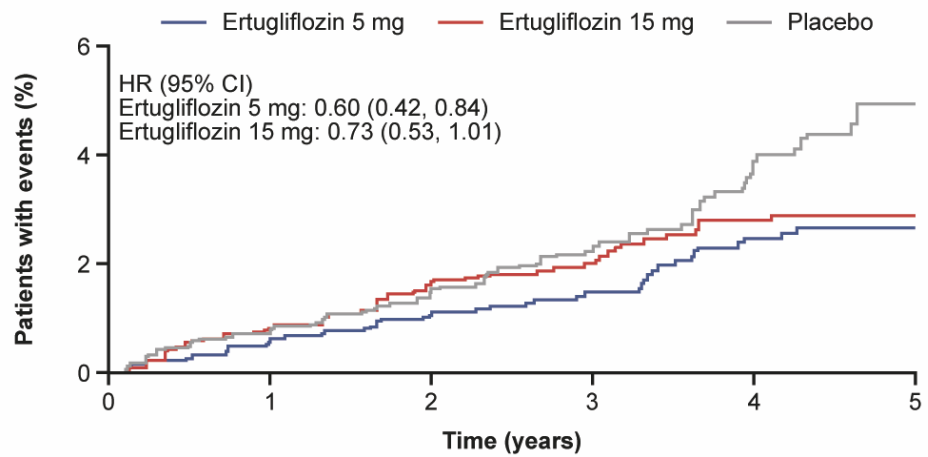

| Number of patients at risk | 0    | 1    | 2    | 3    | 4    | 5   |
|----------------------------|------|------|------|------|------|-----|
| Ertugliflozin 5 mg         | 2752 | 2653 | 2575 | 1379 | 1143 | 201 |
| Ertugliflozin 15 mg        | 2747 | 2635 | 2539 | 1378 | 1133 | 209 |
| Placebo                    | 2747 | 2648 | 2550 | 1366 | 1112 | 212 |

ITT, intention to treat.



**Fig. 4** Per cent change from baseline in UACR by ertugliflozin dose (FAS population)

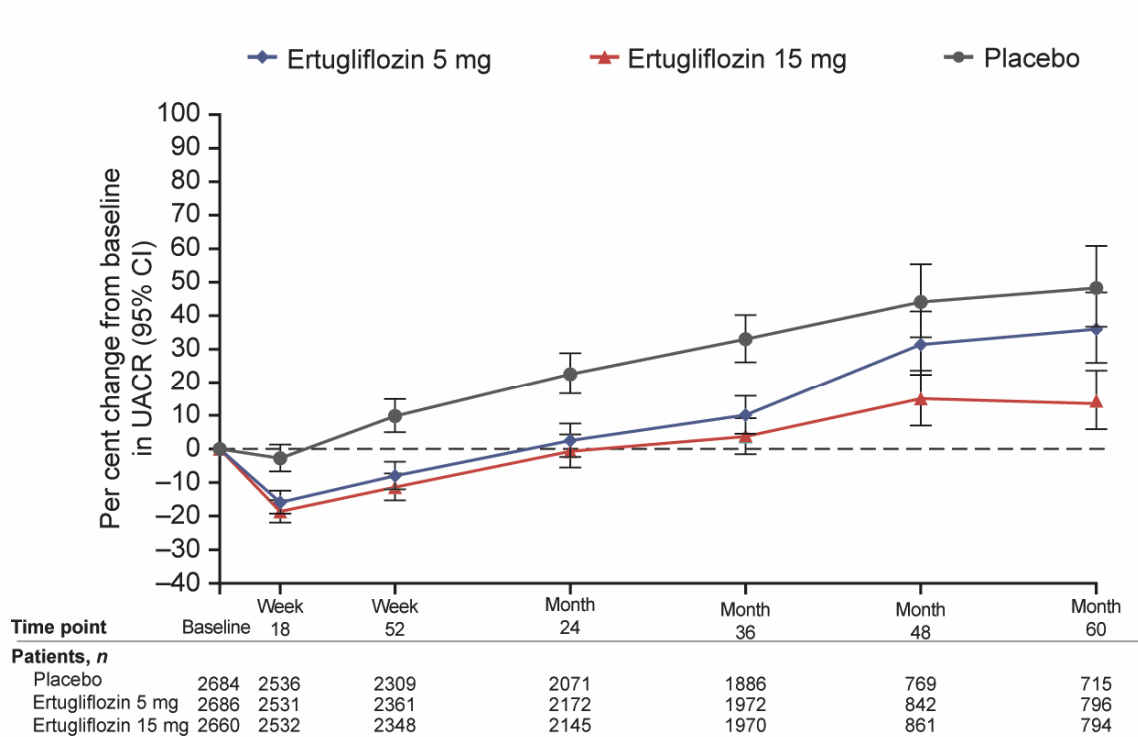

The number for treatment groups at each time point was the number of participants on study medication or who discontinued study medication  $\leq 2$  days before the sample was collected. Differences in per cent change from baseline (95% CI) relative to placebo at Week 18 were  $-13.5$  ( $-18.3, -8.4$ ) and  $-16.3$  ( $-20.9, -11.4$ ) in the ertugliflozin 5 mg and ertugliflozin 15 mg groups, respectively; at Week 52 these were  $-16.2$  ( $-21.3, -10.8$ ) and  $-19.3$  ( $-24.2, -14.2$ ) in the ertugliflozin 5 mg and ertugliflozin 15 mg groups, respectively; at Month 24 these were  $-16.4$  ( $-21.9, -10.5$ ) and  $-19.0$  ( $-24.3, -13.2$ ) in the ertugliflozin 5 mg and ertugliflozin 15 mg groups, respectively; at Month 36 these were  $-17.2$  ( $-23.0, -11.0$ ) and  $-22.1$  ( $-27.5, -16.2$ ) in the ertugliflozin 5 mg and ertugliflozin 15 mg groups, respectively; at Month 48 these were  $-9.3$  ( $-18.2, 0.5$ ) and  $-20.2$  ( $-28.0, -11.6$ ) in the ertugliflozin 5 mg and ertugliflozin 15 mg groups, respectively; at Month 60 these were  $-8.3$  ( $-17.9, 2.5$ ) and  $-23.5$  ( $-31.5, -14.5$ ) in the ertugliflozin 5 mg and ertugliflozin 15 mg groups, respectively.

FAS, full analysis set; UACR, urinary albumin-to-creatinine ratio.

**Fig. 5** Per cent change from baseline in UACR in participants assigned to the KDIGO CKD low-risk category (a), moderate-risk category (b) or high-/very high-risk category (c) (all FAS)

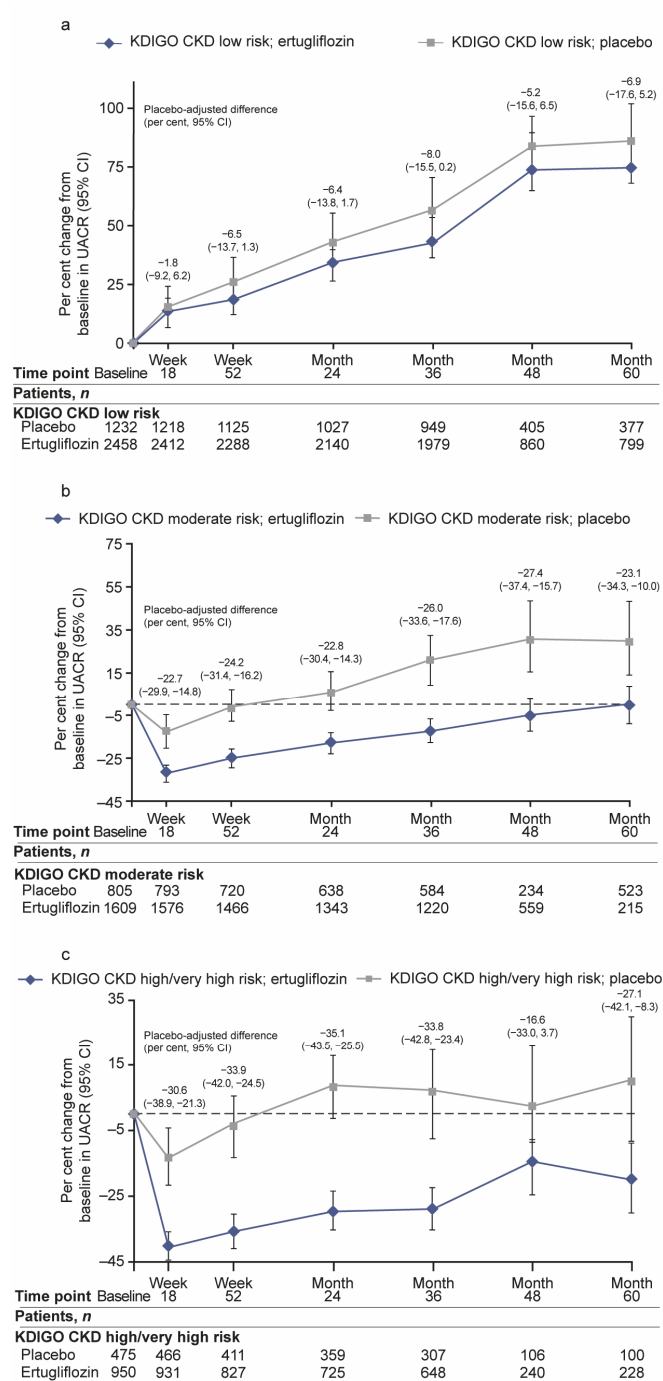

The number for treatment groups at each time point was the number of participants on study medication or who discontinued study medication  $\leq 2$  days before the sample was collected. FAS, full analysis set; KDIGO CKD, Kidney Disease Improving Global Outcomes chronic kidney disease; UACR, urinary albumin-to-creatinine ratio.

**Fig. 6** Per cent change from baseline in UACR in participants with CKD stage 1 at baseline (a), CKD stage 2 at baseline (b) or CKD stage 3 at baseline (c) (all FAS)

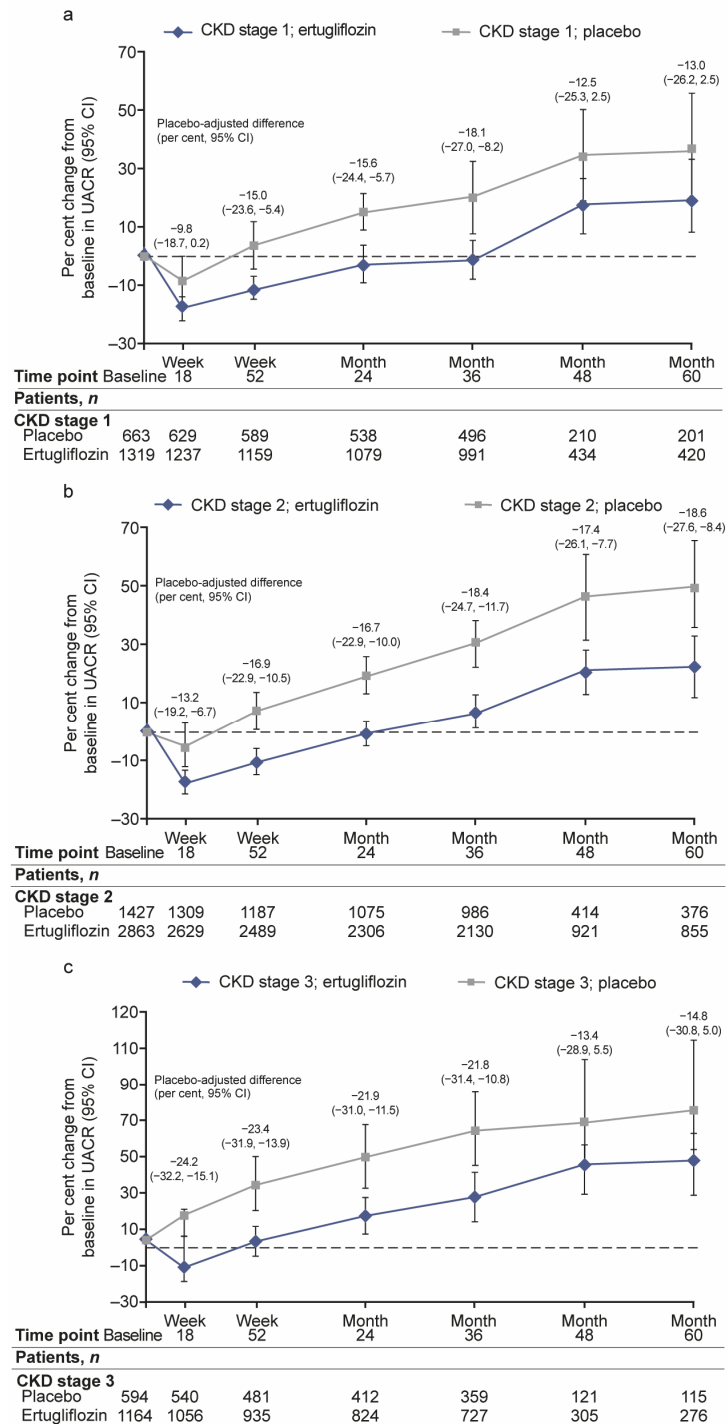

The number for treatment groups at each time point was the number of participants on study medication or who discontinued study medication  $\leq 2$  days before the sample was collected. FAS, full analysis set; KDIGO CKD, Kidney Disease Improving Global Outcomes chronic kidney disease; UACR, urinary albumin-to-creatinine ratio.

**Fig. 7** Mean eGFR over time in the overall population using the MDRD equation (a), by ertugliflozin dose using the CKD-EPI equation (b) or by ertugliflozin dose using the MDRD equation (c) (all FAS)

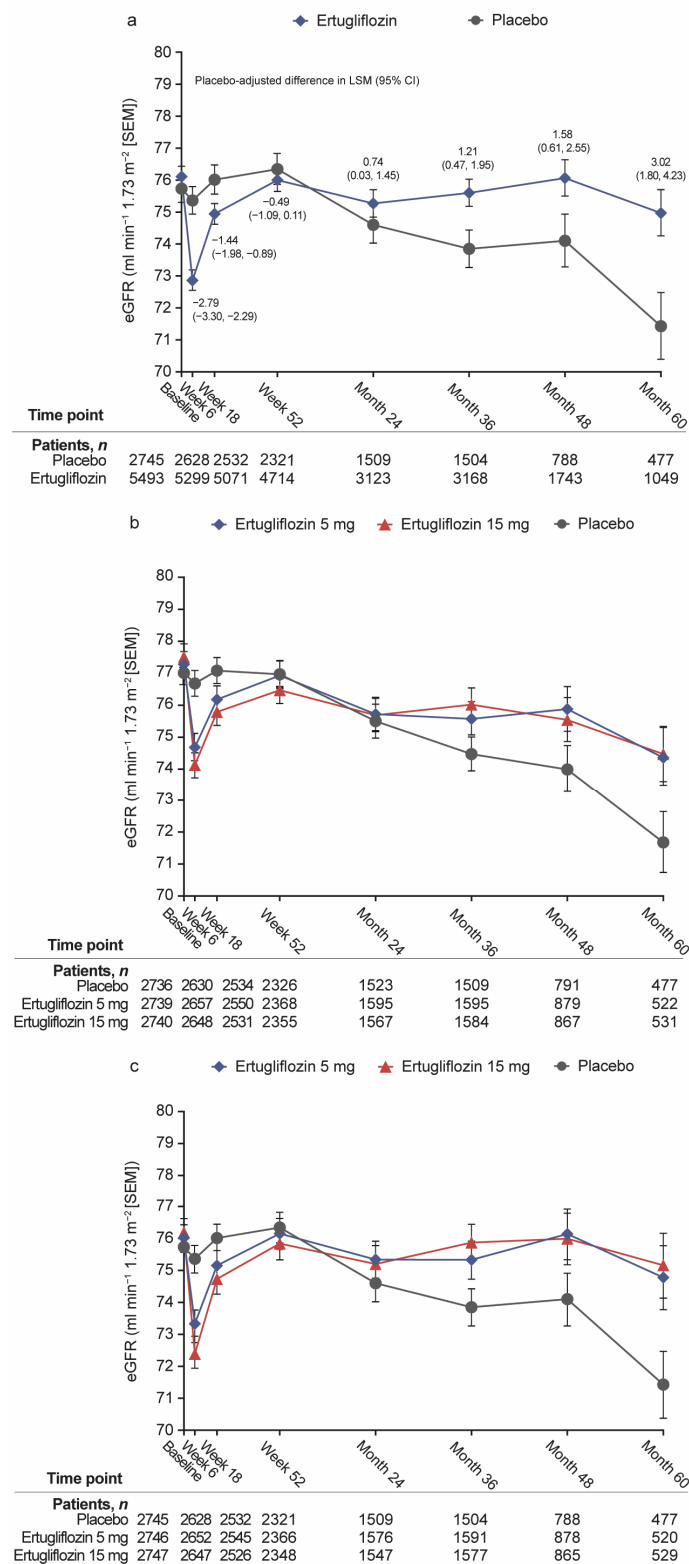

The number for treatment groups at each time point was the number of participants on study medication or who discontinued study medication  $\leq 2$  days before the sample was collected. Panel b: Differences in least squares mean ( $\text{ml min}^{-1} [1.73 \text{ m}]^{-2}$  [95% CI]) relative to placebo at Week 6 were  $-2.16$  ( $-2.64, -1.68$ ) and  $-2.87$  ( $-3.35, -2.39$ ) in the ertugliflozin 5 mg and 15 mg groups, respectively; at Week 18 these were  $-1.16$  ( $-1.70, -0.63$ ) and  $-1.76$  ( $-2.30, -1.23$ ) in the ertugliflozin 5 mg and 15 mg groups, respectively; at Week 52 these were  $-0.01$  ( $-0.61, 0.59$ ) and  $-0.77$  ( $-1.37, -0.17$ ) in the ertugliflozin 5 mg and 15 mg groups, respectively; at Month 24 these were  $0.66$  ( $-0.05, 1.36$ ) and  $-0.03$  ( $-0.74, 0.68$ ) in the ertugliflozin 5 mg and 15 mg groups, respectively; at Month 36 these were  $1.03$  ( $0.27, 1.78$ ) and  $0.94$  ( $0.18, 1.70$ ) in the ertugliflozin 5 mg and 15 mg groups, respectively; at Month 48 these were  $1.76$  ( $0.79, 2.72$ ) and  $1.41$  ( $0.43, 2.38$ ) in the ertugliflozin 5 mg and 15 mg groups, respectively; at Month 60 these were  $2.56$  ( $1.35, 3.77$ ) and  $2.54$  ( $1.33, 3.75$ ) in the ertugliflozin 5 mg and 15 mg groups, respectively. Panel c: Differences in least squares mean ( $\text{ml min}^{-1} [1.73 \text{ m}]^{-2}$  [95% CI]) relative to placebo at Week 6 were  $-2.29$  ( $-2.88, -1.70$ ) and  $-3.30$  ( $-3.89, -2.71$ ) in the ertugliflozin 5 mg and 15 mg groups, respectively; at Week 18 these were  $-1.13$  ( $-1.76, -0.50$ ) and  $-1.74$  ( $-2.38, -1.11$ ) in the ertugliflozin 5 mg and 15 mg groups, respectively; at Week 52 these were  $-0.16$  ( $-0.85, 0.54$ ) and  $-0.83$  ( $-1.53, -0.14$ ) in the ertugliflozin 5 mg and 15 mg groups, respectively; at Month 24 these were  $1.17$  ( $0.36, 1.99$ ) and  $0.31$  ( $-0.51, 1.13$ ) in the ertugliflozin 5 mg and 15 mg groups, respectively; at Month 36 these were  $1.24$  ( $0.38, 2.09$ ) and  $1.18$  ( $0.33, 2.04$ ) in the ertugliflozin 5 mg and 15 mg groups, respectively; at Month 48 these were  $1.70$  ( $0.60, 2.79$ ) and  $1.49$  ( $0.39, 2.59$ ) in the ertugliflozin 5 mg and 15 mg groups, respectively; at Month 60 these were  $3.01$  ( $1.63, 4.39$ ) and  $3.05$  ( $1.67, 4.43$ ) in the ertugliflozin 5 mg and 15 mg groups, respectively. CKD, chronic kidney disease; CKD-EPI, Chronic Kidney Disease Epidemiology Collaboration; FAS, full analysis set; MDRD, Modification of Diet in Renal Disease; UACR, urinary albumin-to-creatinine ratio.

**Fig. 8** Mean eGFR over time in participants assigned to the KDIGO CKD low-risk category (a), moderate-risk category (b) or high-/very high-risk category (c) (all FAS)

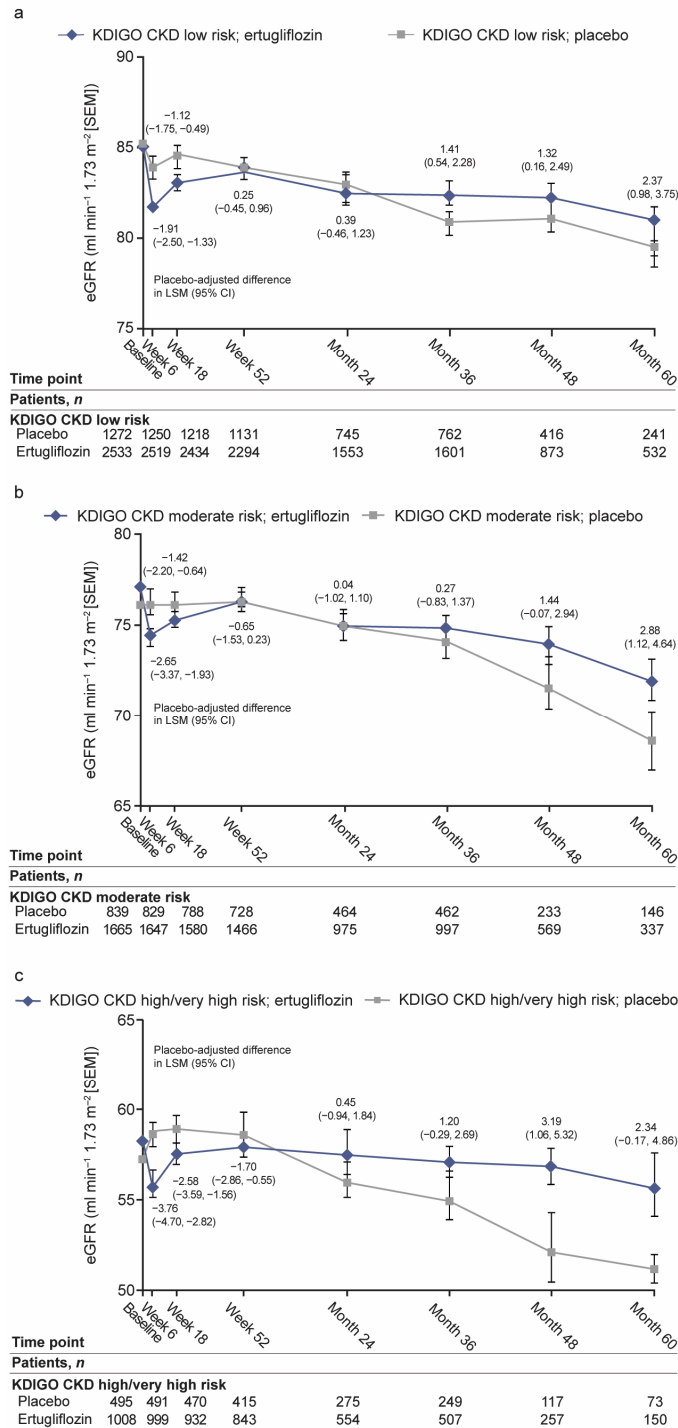

eGFR calculated using the CKD-EPI equation. The number for treatment groups at each time point was the number of participants on study medication or who discontinued study medication  $\leq 2$  days before the sample was collected. CKD-EPI, Chronic Kidney Disease Epidemiology Collaboration; FAS, full analysis set; KDIGO CKD,

Kidney Disease: Improving Global Outcomes chronic kidney disease; LSM, least squares mean; UACR, urinary albumin-to-creatinine ratio.

**Fig. 9** Mean eGFR over time in participants with CKD stage 1 at baseline (a), CKD stage 2 at baseline (b) or CKD stage 3 at baseline (c) (all FAS)

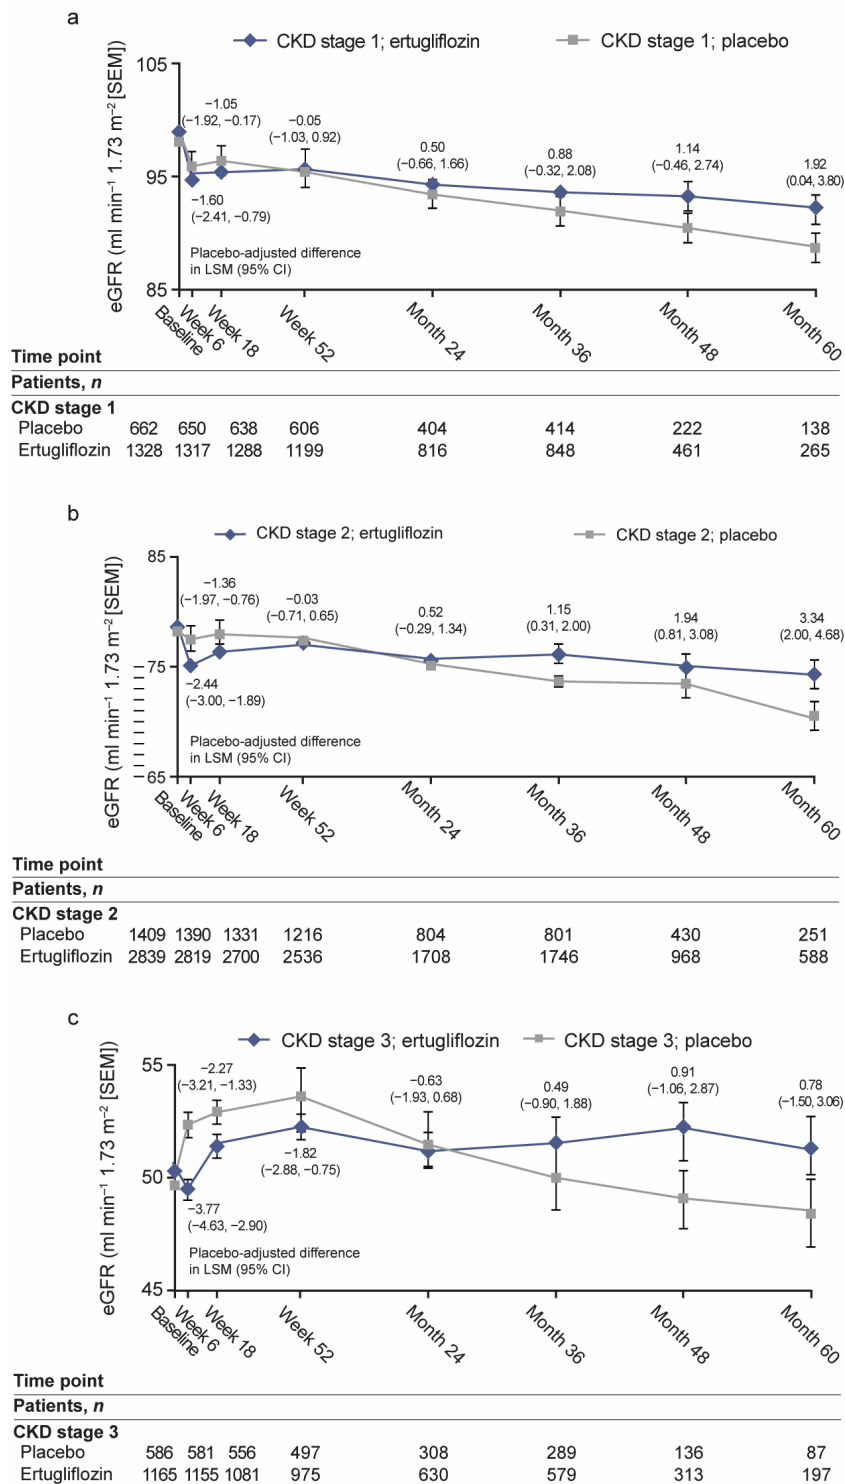

eGFR calculated using the CKD-EPI equation. The number for treatment groups at each time point was the number of participants on study medication or who discontinued study medication  $\leq 2$  days before the sample was



collected. CKD-EPI, Chronic Kidney Disease Epidemiology Collaboration; FAS, full analysis set; LSM, least squares mean; UACR, urinary albumin-to-creatinine ratio.
